# Supplementary material for: Myostatin Mutation Enhances Bovine Myogenic Differentiation through PI3K/AKT/mTOR Signalling via Removing DNA Methylation of RACK1
Source: MDPI journal article supplement (doi:10.3390/cells12010059), 2022-12-23
Supplement: s1 [file s1]

**Extraction of total cellular RNA**

Total cell RNA was extracted using the EASYspin Plus tissue/cell RNA rapid extraction kit (Aidlab Biotechnologies Co., Ltd, Beijing, China). The entire process was performed in a sterile environment using a 24-well plate as an example. Remove the Petri dish from the incubator, observe and photograph under the microscope to record the condition of the cells. Discard the liquid, wash the cells (pre- cooled with enzyme-free PBS), add 350  $\mu$ L RLT Plus to each well to lyse the cells and transfer them to an enzyme-free EP tube. Transfer the liquid to a DNA purification column, centrifuge at 13,000 rpm for 1 minute, and discard the purification column. Immediately add an equal volume of 70% ethanol and mix well. 700  $\mu$ L of the mixture was added to the RA column, centrifuged at 13,000 rpm for 30 s and the filtrate removed. Add 700  $\mu$ L of the deproteinised solution RW1 to the adsorption column, leave for 1 minute, centrifuge at 12000 rpm for 1 minute, and discard the waste liquid. Add 500  $\mu$ L of the rinsing solution RW to the adsorption column, centrifuge at 12,000 rpm for 1 minute, and discard the waste liquid. Repeat this procedure once. Replace with a new collection tube and centrifuge at 13,000 rpm for 3 minutes. Add the adsorption column RA to a new enzyme-free tube, add 35  $\mu$ L of pre-warmed enzyme-free water to the adsorption membrane, leave for 3 minutes and centrifuge at 12,000 rpm for 2 minutes. Repeat this procedure to increase the collection concentration.

**Synthesis of cDNA First Strand**

The first strand of cDNA was synthesized using HiFiScript cDNA Synthesis Kit (CWBIO, Jiangsu, China). The specific operation steps are as follows:

(1) The first-strand cDNA synthesis reaction system was prepared as shown in Table 1, and mixed by pipetting.

| Table1 cDNA first chain synthesis reaction system |                   |
|---------------------------------------------------|-------------------|
| Reagent                                           | Volume ( $\mu$ L) |
| dNTP Mix (2.5 $\mu$ M Each)                       | 4.0               |
| Primer Mix                                        | 2.0               |
| DTT (0.1M)                                        | 2.0               |
| 5 $\times$ RT Buffer                              | 4.0               |
| HiFiScript, 200U/ $\mu$ L                         | 1.0               |

|                              |             |
|------------------------------|-------------|
| RNA Template                 | 50pg~5μg    |
| RNase Free dH <sub>2</sub> O | Add to 20μL |

(2) PCR reaction program settings: 42°C, 15minutes; 85°C, 5minutes; short-term storage at 4°C, and frozen at -20°C.

### Real-time quantitative PCR (qRT-PCR)

All primers for qRT-PCR experiments are detailed in Table 2. The system configuration (Table 2) and procedures (Table 3) are as follows.

Table 2 qRT-PCR reaction system

| Reagent                                           | Volume (μL) |
|---------------------------------------------------|-------------|
| 2×All-in-One <sup>TM</sup> qPCR Mix (GeneCopoeia) | 10.0        |
| Forward primer                                    | 1.0         |
| Reverse primer                                    | 1.0         |
| cDNA template                                     | 2.0         |
| RNase Free dH <sub>2</sub> O                      | Add to 20μL |

Table 3 qRT-PCR reaction program

| Procedure            | Temperature | Time | Cycles |
|----------------------|-------------|------|--------|
| Preincubation        | 95°C        | 600s | 1      |
| 3 Step Amplification | 95°C        | 10s  | 35     |
|                      | 60°C        | 15s  |        |
|                      | 72°C        | 15s  |        |
| Melting              | 95°C        | 10s  | 1      |
|                      | 65°C        | 60s  |        |
|                      | 97°C        | 1s   |        |
| Cooling              | 37°C        | 30s  | 1      |

## Supplementary table 2

Supplementary table 2 Primers of qRT-PCR

| Genes          |   | Primer sequence (5'-3') | Product length<br>(bp) |
|----------------|---|-------------------------|------------------------|
| MSTN           | F | TGTGGAAAAAGAGGGGCTGT    | 112                    |
|                | R | AGCTGTTTCCAGGCGAAGTT    |                        |
| MyHC           | F | TGCTCATCTCACCAAGTTCC    | 105                    |
|                | R | CACTCTTCACTCTCATGGACC   |                        |
| MyoG           | F | CAAATCCACTCCCTGAAA      | 140                    |
|                | R | GCATAGGAAGAGATGAACA     |                        |
| TUBB           | F | CAACAGCACAGCCATCCAGGA   | 131                    |
|                | R | TCTCAGCCTCGGTGAACTCCAT  |                        |
| FAK            | F | TGGCTGCTGCTTACCTTGACC   | 86                     |
|                | R | AGAACGCTCCACACCAGTCC    |                        |
| Rock1          | F | ACCAGGAAGGTGTACGCTATGA  | 96                     |
|                | R | GCTGAACAACCCAAGGACTGT   |                        |
| Rac1           | F | TCCCAACACACCCATCATCCT   | 93                     |
|                | R | GGCGTCAGCTTCTTCTCCTTC   |                        |
| RPS6           | F | CGAATCAGTGGCGGGAACGATA  | 84                     |
|                | R | ACTCAGTAGCAGGCGAACTCTG  |                        |
| EIF4B          | F | TCGTGATGGGTATCGGGACAGT  | 98                     |
|                | R | AGTCTCTGCCACCTCGGTCAT   |                        |
| HSP90B1        | F | GAGTCTCCGTGTGCTCTGGTAG  | 94                     |
|                | R | TGTCCTTGCCTGTCTGGTATGC  |                        |
| PPP2CA         | F | GGGTCCAATGTGTGACTTGC    | 92                     |
|                | R | CCTGCCCAAAGGTGTAACCA    |                        |
| AKT1           | F | ATTACCTGCACTCGGAAAAGGAA |                        |
|                | R | CGGTGATCTTGATGTGCCCCG   |                        |
| RACK1-promoter | F | CCTGGACACCCAGACCCAA     | 86                     |
|                | R | TCTCGCAGAACTGAAAGG      |                        |

---

|        |   |                       |     |
|--------|---|-----------------------|-----|
| RACK1  | F | GGATGGGCAGGCTATGTTGT  |     |
|        | R | GAGCCAGTAGCGGTTAGGAC  |     |
| TET1   | F | GTCTGGTTCGACAGCGTACA  | 171 |
|        | R | CATTGAGCGTGCATCTTCGG  |     |
| TET2   | F | AACCAAGCAAATGCGTTCCC  | 193 |
|        | R | TGGATCCAGGCTCGACCTTA  |     |
| TET3   | F | GGACTCTGCCTTCTGGTGAC  | 187 |
|        | R | GAGGAGAGTTGTGTGAGGGC  |     |
| DNMT1  | F | AGGATGACCCATCTCCCGAA  | 375 |
|        | R | CCCCAGCCCGATCATAACTC  |     |
| DNMT2  | F | CAGCGATCTCTCTGTGCGAA  | 388 |
|        | R | TCCAAGTAGACGGTAACGCTG |     |
| DNMT3A | F | AGAAAGCCAAGGTGATCGCA  | 210 |
|        | R | CCTCGTACTCCGGTTCATCG  |     |
| DNMT3B | F | GACAAGCACGCCAACAGAAG  | 188 |
|        | R | CTGGAGACCTCCCTCTTGGA  |     |

---
