# Supplementary material for: Myostatin Mutation Enhances Bovine Myogenic Differentiation through PI3K/AKT/mTOR Signalling via Removing DNA Methylation of RACK1
Source: MDPI journal article supplement (doi:10.3390/cells12010059), 2022-12-23
Supplement: s1 [file s1]

## Ch-IP experiment

Ch-IP experiments were performed according to the instructions of the the Chromatin Immunoprecipitation (ChIP) Assay Kit (Beyotime Biotechnology, Shanghai, China).

### (1) Optimise of sample collection and sonication conditions

Incubate and mix SDS Lysis Buffer appropriately. Collect cell samples on the third day of differentiation, add 270  $\mu$ L 37% formaldehyde to a 10 cm cell culture dish, shake gently to distribute evenly, and then incubate at 37°C for 10 minutes. Add 1.1 mL glycine solution (10X), shake gently to distribute evenly, and leave at room temperature for 5 minutes. Place the Petri dish on an ice bath and discard the liquid. Add 8 mL of pre-chilled PBS (containing 1 mM PMSF, ready-to-use) and wash the cells twice. Add 1 mL of pre-chilled PBS with 1 mM PMSF and scrape the cells with a cell scraper into a new EP tube. Count the cells and divide them into aliquots (about 1 million per tube). Centrifuge at  $800-1000 \times g$  for 3 minutes at 4°C. Discard the supernatant. Add 200  $\mu$ L SDS Lysis Buffer (containing 1 mM PMSF) to resuspend the cells. Place the cells in an ice bath for 10 minutes to complete lysis. Add 200  $\mu$ L of the sample to an ice bath for sonication. Programme settings (2 mm ultrasound head): Power is 80-90 W, total time 3 minutes, ultrasound on for 4 s, and ultrasound off for 3 seconds. Fragment the genomic DNA so that the fragment size is in the range 200-1000bp. 8  $\mu$ L 5M NaCL was added to the samples after sonication. Incubate at 65°C for 4h. 4  $\mu$ L of the purified DNA fluid was taken and subjected to agarose gel electrophoresis to determine the efficiency of sonication fragmentation of genomic DNA.

### (2) Chromatin immunoprecipitation

After sonication, samples were centrifuged at  $12000-14000 \times g$  for 5 min at 4°C. Transfer the supernatant to a 2mL EP tube. Prepare 1.8 ml of ChIP dilution buffer (1mM PMSF) per sample to dilute the sample to a final volume of 2 mL. Take 20  $\mu$ L of the above liquid as input (positive control) and save it. Add 70  $\mu$ L of protein A+G agarose/salmon sperm DNA to the remaining samples and mix at 4°C for 30 minutes at 4°C. Centrifuge at  $1000 \times g$  for 1 min at 4°C, and transfer the supernatant to a new 2 mL EP tube. Add 2-4  $\mu$ L of the primary antibody. Swirl overnight at 4°C (IgG as negative control). Add 60  $\mu$ L of the protein A+G agarose/salmon sperm DNA

precipitation complex, shake and mix at 4°C for 1 h. Centrifuge at  $1000 \times g$  for 1 min at 4°C. Discard the liquid (do not touch the pellet). The precipitated complexes were then washed with the following solution of 1 mL, washed with shaking at 4 °C for 5 min, and then centrifuged at  $1000 \times g$  for 2 min at 4 °C. Discard the liquid (do not touch the pellet).

- a. Low Salt Immune Complex Wash Buffer 1 wash.
- b. High Salt Immune Complex Wash Buffer 1 wash.
- c. LiCl Immune Complex Wash Buffer 1 wash.
- d. TE Buffer 2 wash.

### (3) PCR amplification of the target gene sequence

Prepare the elution buffer (1% SDS, 0.1M NaHCO<sub>3</sub>, Beyotime Biotechnology, Shanghai, China), ready for use. After washing, add 250 µL of elution buffer. Vortex to mix, set aside at room temperature, and continue washing for 5 minutes with shaking. Centrifuge at  $1000 \times g$  for 1 minute, and transfer the supernatant to a new EP tube. Repeat the washing procedure by adding 250 µL elution buffer to the pellet. Centrifuge at  $1000 \times g$  for 1 minute, and transfer the liquid into an EP tube. Add another 20 µL 5M NaCl (add 1 µL 5M NaCl to the 20 µL Input sample) and mix by pipetting. Heat at 65°C for 4 hours to remove binding of protein and genomic DNA. Purify the samples: Add 20 µL 1M Tris pH 6.5, 10 µL 0.5M EDTA and 1 µL 20 mg/mL proteinase K to the sample. Mix by pipetting and heat the sample at 45°C for 1 h. Sample purification was performed using PCR/DNA purification kit (D0033, Beyotime Biotechnology, Shanghai, China). Input samples do not have to be purified. The purified samples were subjected to PCR experiments. The system (Table S7-1) and procedure (Table S7-2) were as follows:

Table S7-1 PCR reaction system

| Reagent                      | Volume (µL) |
|------------------------------|-------------|
| 2×Es Taq MasterMix (Dye)     | 10.0        |
| Forward primer               | 1.0         |
| Reverse primer               | 1.0         |
| DNA template                 | 2.0         |
| RNase Free dH <sub>2</sub> O | Add to 20µL |

Table S7-2 PCR reaction program

| Procedure       | Temperature | Time    | Cycles |
|-----------------|-------------|---------|--------|
| predenaturation | 94°C        | 5min    |        |
| denaturation    | 94°C        | 30s     | 35     |
| Annealing       | 54°C        | 30s     |        |
| Extension       | 72°C        | 1min30s |        |
| Extension       | 72°C        | 10min   |        |

## CO-IP experiment

Use Pierce Crosslink Magnetic IP/Co-IP Kit (Thermo-scientific, GER) to conduct CO-IP experiments. The specific operation steps are as follows:

### (1) Preparation of cell lysate

Culture untreated bovine skeletal muscle satellite cells to the GM phase, discard the liquid, wash the cells with enzyme-free PBS (pre-chilled), and repeat once. Add the lysis buffer mixture (containing protease inhibitors) to the Pierce lysis/rinse buffer at a ratio of 10:1, pipette 0.5 mL into the culture well, and incubate on ice for 5 min. Transfer the lysate to a new 1.5 mL enzyme-free EP tube and centrifuge at 13,000 rpm for 10 min at 4°C. Transfer the supernatant to a new enzyme-free EP tube.

### (2) Bind the antibody to protein A/G magnetic beads

Prepare a new EP tube, add 0.1 mL of Pierce Lysis/Wash Buffer and 20× Coupling Buffer, make up to 2 mL with ultrapure water to make 1× Coupling Buffer. Vigorously shake the Pierce Protein A/G Magnetic Bead Bottle to fully suspend the magnetic beads. 25 µL of magnetic beads were added to a 1.5 mL EP tube and placed on a magnetic stand for 1 min, and the supernatant was removed. Take 0.5 mL of 1× coupling buffer and add it to the EP tube, slowly invert and mix for 1 min, place it on a magnetic stand, and remove the supernatant. Repeat 1 time. To calculate a final antibody concentration of 5 µg/100 µL, dilute the MSTN primary antibody with 20:1 Pierce Lysis/Wash Buffer and 20× Conjugation Buffer. Add 100 µL of antibody diluent to the EP tube and shake slowly for 15 min to suspend the magnetic beads. Place on a magnetic stand and discard the liquid. Take 100 µL of 1× coupling buffer into the EP tube and mix well. Place on

a magnetic stand and remove the supernatant. Aspirate 300  $\mu\text{L}$  of  $1\times$  coupling buffer into the EP tube and mix well. The magnetic beads were collected and the supernatant was removed. Repeat the operation 1 time.

### (3) Cross-linked antibody

Aspirate 217  $\mu\text{L}$  of DMSO into the tube containing DSS, prepare a  $10\times$  stock solution (25 mM), and mix by pipetting until DSS is completely dissolved. According to the ratio of 100:1, add DMSO to  $10\times$ DSS reagent to prepare DSS with a final concentration of 0.25 mM. Add 4  $\mu\text{L}$  of 0.25 mM DSS, 2.5  $\mu\text{L}$  of  $20\times$  coupling buffer and 43.5  $\mu\text{L}$  of ultrapure water to the beads. Incubate with shaking for 30 min, collect the magnetic beads, and save the supernatant. Add 100  $\mu\text{L}$  of elution buffer to the magnetic beads, shake and incubate for 5 min at room temperature, collect the magnetic beads, and discard the supernatant. Add 100  $\mu\text{L}$  of elution buffer to the beads and mix by inversion. Magnetic beads were collected on a magnetic stand and the supernatant was removed. Repeat this step once. Add 200  $\mu\text{L}$  of Pierce Lysis/Wash Solution (pre-chilled) to the beads and mix by inversion. The magnetic beads are enriched and the liquid is removed.

### (4) Antigen immunoprecipitation

Aspirate the cell lysate into an EP tube containing antibody-linked magnetic beads, and incubate at  $4^{\circ}\text{C}$  with shaking for 12 h to keep the magnetic beads in suspension. Magnetic beads were collected on a magnetic stand, and the supernatant was saved. Add 500  $\mu\text{L}$  Pierce Lysis/Wash Solution to the EP tube and mix well. The magnetic beads were collected and the supernatant was removed. Repeat 1 time. Add 500  $\mu\text{L}$  of ultrapure water to the EP tube and mix well. The magnetic beads were collected and the supernatant was removed. Add 100  $\mu\text{L}$  of eluate to the EP tube, rotate and incubate for 5 min. The beads are enriched and the eluate is saved. This step can be repeated 1 time. After elution, neutralizing solution was added to the above eluent at a ratio of 1:10 to neutralize the pH of the eluent, and the final product was used for Western blot detection.
