# Supplementary material for: Myostatin Mutation Enhances Bovine Myogenic Differentiation through PI3K/AKT/mTOR Signalling via Removing DNA Methylation of RACK1
Source: MDPI journal article supplement (doi:10.3390/cells12010059), 2022-12-23
Supplement: s1 [file s1]

## Design and synthesis of siRNA

The siRNAs of the gene were designed and synthesized by Guangzhou RiboBio Co., Ltd. (RiboBio, Guangzhou, China). The sequences are detailed in Table 1 and Table 2.

Table 1 Sequences of si-MSTN

| Fragment Name   | Sequence (5'-3')    |
|-----------------|---------------------|
| si-bta-MSTN_001 | TGGCGAAGGACAAATAATA |
| si-bta-MSTN_002 | CACTACATCCTCAAGACTA |
| si-bta-MSTN_003 | GGCTTGATTGTGATGAACA |

Table 2 Sequences of si-RACK1

| Fragment Name    | Sequence (5'-3')    |
|------------------|---------------------|
| si-bta-RACK1_001 | CCAGAGATGAGACCAACTA |
| si-bta-RACK1_002 | GCCATACCAAAGATGTGCT |
| si-bta-RACK1_003 | CTGGGTGTATGCAAGTATA |

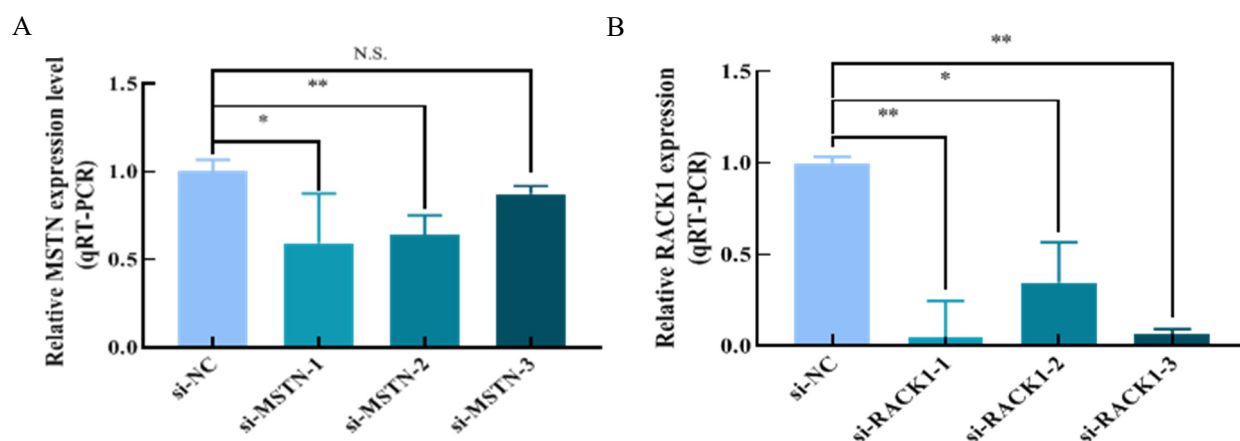

**Supplementary Figure.** The siRNA interference effect map. A, siRNA inhibits transcription of MSTN. B, siRNA inhibits the transcription of RACK1.

## Construction of overexpression vector

The complete sequence of the CDS region of the RACK1 gene (*Bos taurus*) is from the NCBI website (<https://www.ncbi.nlm.nih.gov/>) and totals 984 bp. Use

pcDNA3.1(+) plasmid, BamHI and EcoRI restriction sites. PCR amplification and cloning of the full-length CDS region of RACK1 was performed using the bovine genome sequence as a template. Glue recovery to obtain the target sequence. The configuration system of the PCR is shown in Table 3, and the programme settings are shown in Table 4.

Table 3 PCR amplification system

| Reagent               | Volume (μL) |
|-----------------------|-------------|
| 2*Super Pfx MasterMix | 10          |
| Forward Primer        | 1           |
| Reverse Primer        | 1           |
| cDNA                  | 2           |
| ddH <sub>2</sub> O    | Up to 20    |

Table 4 PCR reaction program

| Procedure       | Temperature | Time | Cycles |
|-----------------|-------------|------|--------|
| Predenaturation | 95℃         | 2min | 35     |
| Denaturation    | 95℃         | 30s  |        |
| Annealing       | 65℃         | 30s  |        |
| Extension       | 72℃         | 1min |        |
| Extension       | 72℃         | 2min |        |

The product concentration of gel recovery was measured. Using the nucleic acid restriction enzymes EcoRI and BamHI, the product and pcDNA3.1(+) plasmid were recovered simultaneously in the digestion gel, and the system was configured according to Table 5. React in a PCR machine at 37℃ for 30 minutes. Purify the product with a purification kit, and then ligate with T4 ligase to generate the RACK1 gene expression vector pcDNA3.1(+)-RACK1. Finally, carry out the conversion.

Table 5 Building a carrier configuration system

| Reagent               | PcDNA3.1(+) volume (μL) |
|-----------------------|-------------------------|
| 10xFast Digest Buffer | 2                       |
| EcoRI                 | 1                       |

|       |                      |
|-------|----------------------|
| BamHI | 1                    |
| DNA   | 1000ng/concentration |
| ddH2O | 20-X                 |

Transformation process: take 10  $\mu$ L of the ligation product, add it to 50  $\mu$ L of competent DH5 $\alpha$ cells, and leave it for 25 minutes. Perform a heat shock in a water bath at 42°C for 45 s and then leave in an ice bath for 2 min. Add 500  $\mu$ L of liquid LB medium without ampicillin to the tube and let it stand at 37° C and 180 rpm for 1 hour. The revival solution was spread on LB solid petri dishes containing ampicillin and left upside down overnight at 37°C in an incubator. The positive bacteria were selected for colony PCR verification. At the same time, the positive bacteria were collected and cultured in liquid LB medium with ampicillin at 37°C and 180 rpm overnight. Finally, the plasmids were extracted for sequencing and comparison.
