# Supplementary material for: Myostatin Mutation Enhances Bovine Myogenic Differentiation through PI3K/AKT/mTOR Signalling via Removing DNA Methylation of RACK1
Source: Cells. 2022 Dec 23;12(1):59. doi: 10.3390/cells12010059 (PMC9818849; doi:10.3390/cells12010059)
Supplement: Supplementary file 1 [file cells-12-00059-s001.zip]

Archive with 11 entries (11 files):
- Supplementary Material File S1.pdf
- Supplementary Material File S11.pdf
- Supplementary Material File S2.pdf
- Supplementary Material File S3.pdf
- Supplementary Material File S4.pdf
- Supplementary Material File S5.pdf
- Supplementary Material File S6.pdf
- Supplementary Material File S7.pdf
- Supplementary Material File S8.pdf
- Supplementary Material File S9.pdf
- Supplementary_Material File S10.xlsx
