# Supplementary material for: Myostatin Mutation Enhances Bovine Myogenic Differentiation through PI3K/AKT/mTOR Signalling via Removing DNA Methylation of RACK1
Source: Cells. 2022 Dec 23;12(1):59. doi: 10.3390/cells12010059 (PMC9818849; doi:10.3390/cells12010059)
Supplement: Supplementary file 1 [file cells-12-00059-s001.zip › Supplementary_Material File S10.xlsx]

## Sheet: ZJY vs FZ, WGBS-seq
Name	Gene_ID	chr	start	end	length	nCG	F81209	F81199	F81208	F81210	F81214	Z61004	Z61020	Z61117	Z61128	Z61023	N: -Log Student's T-test p-value Z_F	N: Student's T-test Difference Z_F	Fold change	N: Student's T-test Test statistic Z_F
RACK1	ENSBTAG00000019648	7	40376449	40376559	111	11	0.102336	0.103497	0.119988	0.0679266	0.125677	0.00774045	0.0405953	0.0239899	0.0534632	0.0178571	2.47818	-2.11158	0.231393	-4.12413
BDKRB2	ENSBTAG00000021717	21	61081288	61081399	112	18	0.0953415	0.0522306	0.0389635	0.051857	0.0438685	0.189702	0.0659054	0.186022	0.148677	0.194236	2.35253	1.44989	2.73187	3.9164
ADCY2	ENSBTAG00000019210	20	65549722	65549787	66	8	0.730143	0.774863	0.701141	0.79623	0.473304	0.499207	0.277311	0.239286	0.25974	0.266091	3.04942	-1.20578	0.433535	-5.13331
ITPR1	ENSBTAG00000020455	22	21529984	21530153	170	4	0.714286	0.882555	0.975	0.918269	0.948413	0.496528	0.5	0.177083	0.4419	0.211397	2.5281	-1.40522	0.377561	-4.20795

## Sheet: ZJY vs FZ, RNA-seq
Name	Gene_ID	Z23/AV	Z20/AV	Z04/AV	Z28/AV	Z17/AV	F09/AV	F10/AV	F08/AV	F14/AV	F99/AV	C: Student's T-test Significant ZJY	C: Student's T-test significant	N: -Log Student's T-test p-value ZJY	N: Student's T-test Difference ZJY	Fold change	N: Student's T-test Test statistic ZJY
RACK1	ENSBTAG00000019648	0.966635	0.752391	0.654707	0.876762	0.825569	0.00205751	0.00199767	0.0414125	0.0028581	0.045651	+	ZJY	6.3793	0.815477	1.75988	14.8455
BDKRB2	ENSBTAG00000021717	0.997486	0.435072	0.522423	0.303165	1.65414	0.741136	2.35143	0.943152	0.188089	0.776196	+	ZJY	0.198957	-0.215529	0.86123	-0.29529
ADCY2	ENSBTAG00000019210	0.971224	1.28521	1.08845	1.25135	0.348821	0.0248635	0.242593	0.0942829	0.0329354	0.120605	+	ZJY	3.22884	0.995031	1.99312	5.47574
ITPR1	ENSBTAG00000020455	1.79126	1.05733	1.12349	0.64004	1.61784	0.169001	0.114856	0.0642909	0.0737447	0.164904	+	ZJY	3.3914	1.25145	2.38081	5.79805
